# Supplementary material for: Bacterial Natural Disaccharide (Trehalose Tetraester): Molecular Modeling and in Vitro Study of Anticancer Activity on Breast Cancer Cells
Source: MDPI journal article supplement (doi:10.3390/polym12020499), 2020-02-24
Supplement: s1 [file s1]

# Supplementary material

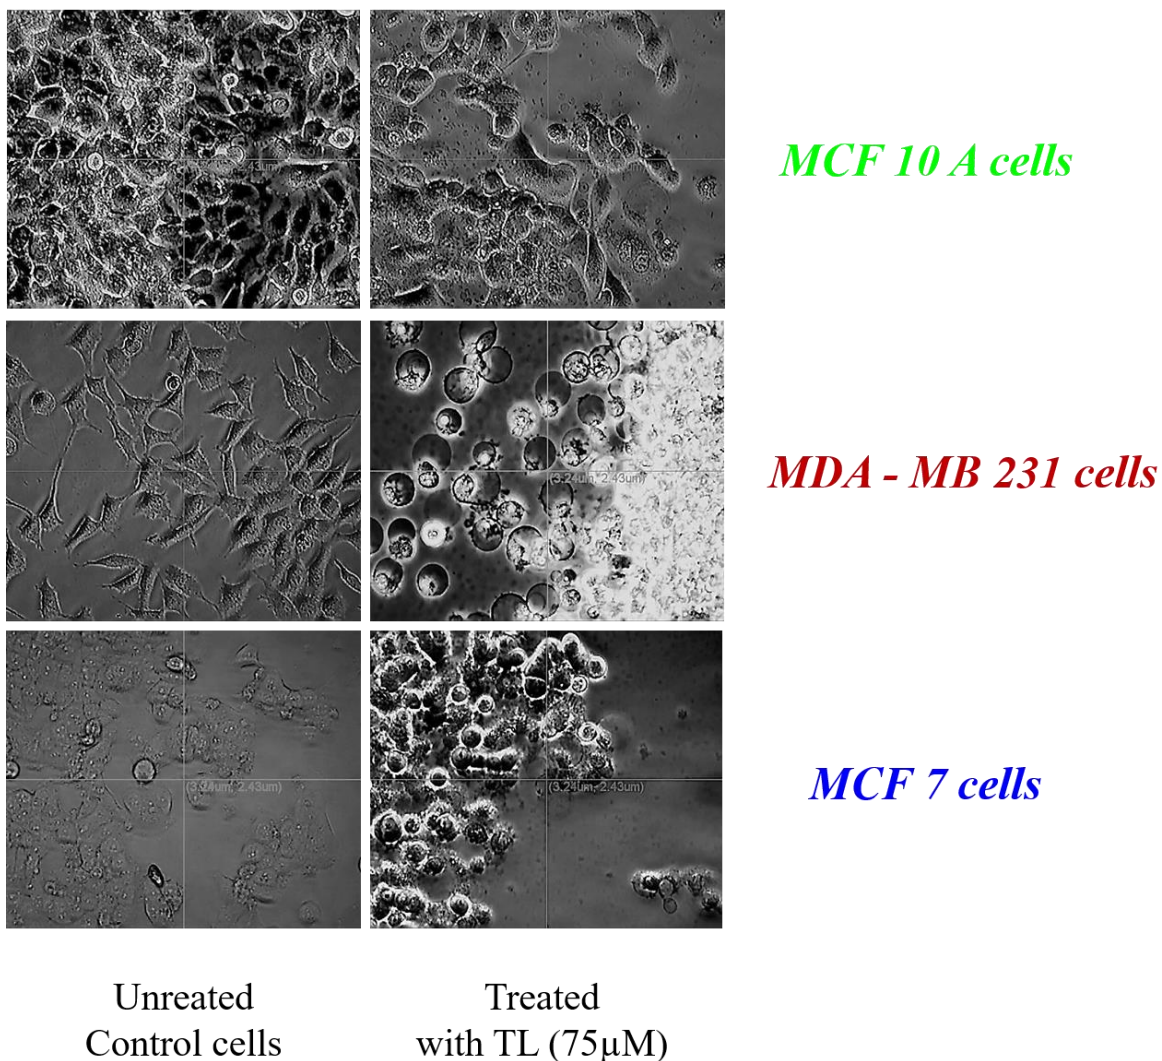

**Figure S1.** Changes in cell morphology of normal MCF10A cells /top panel/ and cancer cells /MDA-MB231 cells – middle panel; MCF7 cells – bottom panel/ 48 h after treatment with subcytotoxic concentration TL concentration (75 μmol), analyzed by phase-contrast light microscopy. Untreated cells were used as a control.
